# Supplementary material for: Accumulation of DNA methylation alterations in paediatric glioma stem cells following fractionated dose irradiation
Source: PubMed Central journal article supplement (PMC7014676; doi:10.1186/s13148-020-0817-8), 2020-02-11
Supplement: 13148_2020_817_MOESM1_ESM.pdf [file 13148_2020_817_MOESM1_ESM.pdf]

Suppl table 1

| IllmnID    | Gene         | $\Delta\beta$ |
|------------|--------------|---------------|
| cg00524708 | PRSS36       | 0.67          |
| cg16219246 |              | 0.64          |
| cg00051595 |              | 0.64          |
| cg20311846 | SHROOM3      | 0.63          |
| cg10967023 |              | 0.61          |
| cg27417997 | SHROOM3      | 0.60          |
| cg05851730 |              | 0.60          |
| cg03561565 | KCNS2        | 0.58          |
| cg15046481 |              | 0.58          |
| cg03256780 | SLC8A1       | 0.56          |
| cg04955116 |              | 0.56          |
| cg00615941 |              | 0.55          |
| cg19008222 |              | 0.55          |
| cg13338137 |              | 0.54          |
| cg05654008 | ITGA9        | 0.54          |
| cg02687055 | MFSD2B       | 0.54          |
| cg06805940 | ATP10B       | 0.54          |
| cg10282845 | PPTC7        | 0.53          |
| cg03344693 |              | 0.53          |
| cg16026813 | BTRC         | 0.53          |
| cg23341089 |              | 0.53          |
| cg27242549 | ZC3H8        | 0.53          |
| cg27281765 | PMP2         | 0.52          |
| cg06282270 | VWCE         | 0.52          |
| cg04044188 | PDSS1        | 0.52          |
| cg14979674 | HCN1         | 0.52          |
| cg09550083 | MEIS1        | 0.52          |
| cg14283978 |              | 0.52          |
| cg27146152 | XAF1         | 0.52          |
| cg04052934 |              | 0.52          |
| cg12725323 | LCE1D        | 0.52          |
| cg19162496 | SHROOM3      | 0.52          |
| cg13869401 |              | 0.52          |
| cg05964600 | HCN1         | 0.51          |
| cg08759041 | MCC          | 0.51          |
| cg26876444 | LEPR         | 0.51          |
| cg27570256 | LOC100270710 | 0.51          |
| cg15078838 | BRE          | 0.51          |

| <b>IlmnID</b> | <b>Gene</b>  | $\Delta\beta$ |
|---------------|--------------|---------------|
| cg00805867    | PDE4B        | 0.51          |
| cg04464085    |              | 0.50          |
| cg25345746    |              | 0.50          |
| cg06282029    |              | 0.50          |
| cg20924825    |              | 0.50          |
| cg17315500    |              | 0.50          |
| cg16621833    | VGLL2;VGLL2  | 0.50          |
| cg12280150    | HEPHL1       | 0.50          |
| cg07893738    |              | 0.50          |
| cg02360367    | SKI          | 0.50          |
| cg06550214    | RNF220       | 0.50          |
| cg14047478    | NTN1         | 0.49          |
| cg06115810    | PDE4B        | 0.49          |
| cg10116443    | SLC22A9      | 0.49          |
| cg04403415    | NCOR2;NCOR2  | 0.49          |
| cg19130189    | MMP16        | 0.49          |
| cg16320249    |              | 0.49          |
| cg12072178    | VAMP3        | 0.49          |
| cg00728890    |              | 0.49          |
| cg03489382    | CCDC136      | 0.49          |
| cg12082609    | MEIS1        | 0.49          |
| cg08942800    | CRISP2       | 0.49          |
| cg21832148    |              | 0.48          |
| cg15193473    | BIVM;BIVM    | 0.48          |
| cg06339924    | TRIM42       | 0.48          |
| cg10543574    |              | 0.48          |
| cg25105745    | MIR197       | 0.48          |
| cg22448304    |              | 0.48          |
| cg23737061    | FHIT;FHIT    | 0.48          |
| cg03397031    | OPRD1        | 0.48          |
| cg12109823    |              | 0.48          |
| cg25340973    | SUCLA2       | 0.48          |
| cg14326671    | LOC100192378 | 0.48          |
| cg23166389    | LHX8         | 0.48          |
| cg02706919    |              | 0.48          |
| cg09347495    | CLIC5        | 0.48          |
| cg04553838    | TRPC6        | 0.48          |
| cg24473633    | DENND3       | 0.48          |
| cg13942283    | RBM20        | 0.47          |
| cg14873600    |              | 0.47          |
| cg23490638    |              | 0.47          |
| cg06823060    | CMIP         | 0.47          |
| cg19555986    | MAP7         | 0.47          |
| cg17994569    | CHAT         | 0.47          |

| <b>IllumnID</b> | <b>Gene</b> | $\Delta\beta$ |
|-----------------|-------------|---------------|
| cg07102913      |             | 0.47          |
| cg24701270      | ZNF662      | 0.47          |
| cg08767938      |             | 0.47          |
| cg14257199      |             | 0.47          |
| cg20477005      | SLC26A10    | 0.47          |
| cg17663774      |             | 0.47          |
| cg13849454      |             | 0.47          |
| cg18127012      |             | 0.47          |
| cg11367259      |             | 0.47          |
| cg17078190      |             | 0.47          |
| cg13636952      |             | 0.47          |
| cg23273897      | MME         | 0.47          |
| cg09038914      | GFAP        | 0.46          |
| cg15410903      | GSTO2       | 0.46          |
| cg02055483      | NPAS4       | 0.46          |
| cg03122427      |             | 0.46          |
| cg01491071      |             | 0.46          |
| cg07891120      |             | 0.46          |
